# Supplementary material for: Exploration of Molecular Mechanism of Traditional Chinese Tuina Therapy for Insomnia by Proteomics Analysis
Source: Research Square preprint supplement (doi:10.21203/rs.3.rs-131184/v1), 2021-01-13
Supplement: Supplementary file 1 [file 031af30483fcbcc3dcb7bb43.xlsx]

## Sheet: InsomniaTherapyvsControl
N	Accession	Name	Diff_state	ATT vs HC	PVal InsomniaTherapy:Control	GO_function(Biological_Process)	GO_function(Cellular_Component)	GO_function(Molecular_Function)	COG_function	Kegg_function	GO_enrichment(Biological_Process)	GO_enrichment(Cellular_Component)	GO_enrichment(Molecular_Function)	Kegg_enrichment
45	sp|P00738|HPT_HUMAN	Haptoglobin OS=Homo sapiens OX=9606 GN=HP PE=1 SV=1	down	0.188035	0.000199841	immune system process;biological regulation;cellular process;positive regulation of biological process;localization;response to stimulus;metabolic process;death;multi-organism process;negative regulation of biological process;regulation of biological process;establishment of localization;cellular component organization or biogenesis	extracellular region;extracellular region part;cell part;membrane-enclosed lumen;organelle;organelle part;macromolecular complex;cell	antioxidant activity;binding;catalytic activity		Systemic lupus erythematosus;Phagosome;Complement and coagulation cascades;Staphylococcus aureus infection	GO:0006810,transport;GO:0009605,response to external stimulus;GO:0008152,metabolic process;GO:0009607,response to biotic stimulus;GO:0006979,response to oxidative stress;GO:0002526,acute inflammatory response;GO:0051179,localization;GO:0050896,response to stimulus;GO:0065009,regulation of molecular function;GO:0009056,catabolic process;GO:0042221,response to chemical stimulus;GO:0051234,establish…	GO:0043230,extracellular organelle;GO:0031982,vesicle;GO:0031838,haptoglobin-hemoglobin complex;GO:0031988,membrane-bounded vesicle;GO:0043227,membrane-bounded organelle;GO:0044421,extracellular region part;GO:0005576,extracellular region;GO:0043234,protein complex;GO:0032991,macromolecular complex;GO:0070062,extracellular vesicular exosome;GO:0043226,organelle;GO:0065010,extracellular membrane-b…	GO:0008236,serine-type peptidase activity;GO:0003824,catalytic activity;GO:0016787,hydrolase activity;GO:0017171,serine hydrolase activity;GO:0016209,antioxidant activity;GO:0005515,protein binding;GO:0030492,hemoglobin binding;GO:0004252,serine-type endopeptidase activity;GO:0004175,endopeptidase activity;GO:0008233,peptidase activity;GO:0070011,peptidase activity, acting on L-amino acid peptide…	ko04145,Phagosome;ko05322,Systemic lupus erythematosus;ko05150,Staphylococcus aureus infection;ko04610,Complement and coagulation cascades
115	sp|P68871|HBB_HUMAN	Hemoglobin subunit beta OS=Homo sapiens OX=9606 GN=HBB PE=1 SV=2	down	0.0350894	0.000658554	positive regulation of biological process;localization;response to stimulus;biological regulation;cellular process;cellular component organization or biogenesis;biological adhesion;multicellular organismal process;regulation of biological process;establishment of localization;metabolic process;death	extracellular region part;cell part;extracellular region;membrane-enclosed lumen;organelle;organelle part;cell;macromolecular complex	catalytic activity;binding;transporter activity;antioxidant activity		Malaria	GO:0048518,positive regulation of biological process;GO:0065008,regulation of biological quality;GO:0009987,cellular process;GO:0006811,ion transport;GO:0003008,system process;GO:0016337,cell-cell adhesion;GO:0031325,positive regulation of cellular metabolic process;GO:0009611,response to wounding;GO:0019222,regulation of metabolic process;GO:0015669,gas transport;GO:0050817,coagulation;GO:000989…	GO:0005829,cytosol;GO:0005622,intracellular;GO:0031982,vesicle;GO:0043226,organelle;GO:0005737,cytoplasm;GO:0032991,macromolecular complex;GO:0065010,extracellular membrane-bounded organelle;GO:0044445,cytosolic part;GO:0043227,membrane-bounded organelle;GO:0031988,membrane-bounded vesicle;GO:0043234,protein complex;GO:0005576,extracellular region;GO:0044421,extracellular region part;GO:0005833,h…	GO:0016684,oxidoreductase activity, acting on peroxide as acceptor;GO:0016491,oxidoreductase activity;GO:0046914,transition metal ion binding;GO:0043167,ion binding;GO:0031720,haptoglobin binding;GO:0046906,tetrapyrrole binding;GO:0022892,substrate-specific transporter activity;GO:0046872,metal ion binding;GO:0005515,protein binding;GO:0016209,antioxidant activity;GO:0043169,cation binding;GO:000…	ko05144,Malaria
80	sp|P02790|HEMO_HUMAN	Hemopexin OS=Homo sapiens OX=9606 GN=HPX PE=1 SV=2	down	0.194167	0.000714191	immune system process;response to stimulus;positive regulation of biological process;localization;cellular process;biological regulation;viral reproduction;signaling;metabolic process;cellular component organization or biogenesis;establishment of localization;regulation of biological process	organelle;organelle part;cell;cell part;extracellular region part;extracellular region;membrane-enclosed lumen	binding;catalytic activity;transporter activity			GO:0002699,positive regulation of immune effector process;GO:0006897,endocytosis;GO:0080090,regulation of primary metabolic process;GO:0002819,regulation of adaptive immune response;GO:0055066,di-, tri-valent inorganic cation homeostasis;GO:0010646,regulation of cell communication;GO:0006873,cellular ion homeostasis;GO:0009966,regulation of signal transduction;GO:0051247,positive regulation of pr…	GO:0031982,vesicle;GO:0043230,extracellular organelle;GO:0070062,extracellular vesicular exosome;GO:0043226,organelle;GO:0065010,extracellular membrane-bounded organelle;GO:0031988,membrane-bounded vesicle;GO:0043227,membrane-bounded organelle;GO:0044421,extracellular region part;GO:0005576,extracellular region	GO:0003824,catalytic activity;GO:0046872,metal ion binding;GO:0016798,hydrolase activity, acting on glycosyl bonds;GO:0005506,iron ion binding;GO:0016787,hydrolase activity;GO:0020037,heme binding;GO:0005215,transporter activity;GO:0005488,binding;GO:0046914,transition metal ion binding;GO:0043167,ion binding;GO:0046906,tetrapyrrole binding;GO:0043169,cation binding;GO:0005515,protein binding
159	sp|P02741|CRP_HUMAN	C-reactive protein OS=Homo sapiens OX=9606 GN=CRP PE=1 SV=1	up	2.74372	0.000770733	establishment of localization;regulation of biological process;multicellular organismal process;cellular component organization or biogenesis;multi-organism process;metabolic process;negative regulation of biological process;biological regulation;cellular process;developmental process;response to stimulus;positive regulation of biological process;localization;immune system process	extracellular region part;extracellular region;organelle	binding		Proximal tubule bicarbonate reclamation;Pancreatic secretion;Nitrogen metabolism;Gastric acid secretion;Collecting duct acid secretion	GO:0045637,regulation of myeloid cell differentiation;GO:0045638,negative regulation of myeloid cell differentiation;GO:0048522,positive regulation of cellular process;GO:0051241,negative regulation of multicellular organismal process;GO:0045596,negative regulation of cell differentiation;GO:0031323,regulation of cellular metabolic process;GO:0048519,negative regulation of biological process;GO:0…	GO:0043230,extracellular organelle;GO:0031982,vesicle;GO:0044421,extracellular region part;GO:0005615,extracellular space;GO:0005576,extracellular region;GO:0043227,membrane-bounded organelle;GO:0031988,membrane-bounded vesicle;GO:0065010,extracellular membrane-bounded organelle;GO:0070062,extracellular vesicular exosome;GO:0043226,organelle	GO:0043178,alcohol binding;GO:0046790,virion binding;GO:0046872,metal ion binding;GO:0001848,complement binding;GO:0043167,ion binding;GO:0050997,quaternary ammonium group binding;GO:0030169,low-density lipoprotein binding;GO:0043176,amine binding;GO:0005102,receptor binding;GO:0001846,opsonin binding;GO:0005509,calcium ion binding;GO:0008034,lipoprotein binding;GO:0043169,cation binding;GO:00018…	ko04966,Collecting duct acid secretion;ko04971,Gastric acid secretion;ko00910,Nitrogen metabolism;ko04972,Pancreatic secretion;ko04964,Proximal tubule bicarbonate reclamation
65	sp|P27169|PON1_HUMAN	Serum paraoxonase/arylesterase 1 OS=Homo sapiens OX=9606 GN=PON1 PE=1 SV=3	up	6.99654	0.000962779	establishment of localization;regulation of biological process;negative regulation of biological process;metabolic process;response to stimulus;positive regulation of biological process;localization;cellular process;biological regulation	organelle;extracellular region part;cell part;extracellular region;macromolecular complex;cell	catalytic activity;binding;antioxidant activity		Microbial metabolism in diverse environments;Metabolic pathways	GO:0032268,regulation of cellular protein metabolic process;GO:0032368,regulation of lipid transport;GO:0050789,regulation of biological process;GO:0043436,oxoacid metabolic process;GO:0031324,negative regulation of cellular metabolic process;GO:0032269,negative regulation of cellular protein metabolic process;GO:0051248,negative regulation of protein metabolic process;GO:0042221,response to chem…	GO:0005615,extracellular space;GO:0044424,intracellular part;GO:0005623,cell;GO:0070062,extracellular vesicular exosome;GO:0044464,cell part;GO:0043230,extracellular organelle;GO:0034358,plasma lipoprotein particle;GO:0005576,extracellular region;GO:0044421,extracellular region part;GO:0032994,protein-lipid complex;GO:0043227,membrane-bounded organelle;GO:0031988,membrane-bounded vesicle;GO:00343…	GO:0046872,metal ion binding;GO:0016787,hydrolase activity;GO:0008289,lipid binding;GO:0042803,protein homodimerization activity;GO:0043167,ion binding;GO:0003824,catalytic activity;GO:0005509,calcium ion binding;GO:0016788,hydrolase activity, acting on ester bonds;GO:0042802,identical protein binding;GO:0042578,phosphoric ester hydrolase activity;GO:0005488,binding;GO:0046983,protein dimerizatio…	ko01120,Microbial metabolism in diverse environments;ko01100,Metabolic pathways
31	sp|P07225|PROS_HUMAN	Vitamin K-dependent protein S OS=Homo sapiens OX=9606 GN=PROS1 PE=1 SV=1	up	2.22647	0.00101914	locomotion;immune system process;cellular process;biological regulation;response to stimulus;localization;positive regulation of biological process;multi-organism process;metabolic process;negative regulation of biological process;establishment of localization;regulation of biological process;multicellular organismal process;cellular component organization or biogenesis	organelle;organelle part;extracellular region part;cell part;extracellular region;membrane-enclosed lumen;macromolecular complex;cell	enzyme regulator activity;binding		Complement and coagulation cascades	GO:0032879,regulation of localization;GO:0051704,multi-organism process;GO:0030162,regulation of proteolysis;GO:0007599,hemostasis;GO:0043086,negative regulation of catalytic activity;GO:0009894,regulation of catabolic process;GO:0016485,protein processing;GO:0040011,locomotion;GO:0080134,regulation of response to stress;GO:0034960,cellular biopolymer metabolic process;GO:0080090,regulation of pr…	GO:0070062,extracellular vesicular exosome;GO:0005796,Golgi lumen;GO:0044431,Golgi apparatus part;GO:0044432,endoplasmic reticulum part;GO:0016023,cytoplasmic membrane-bounded vesicle;GO:0044425,membrane part;GO:0044464,cell part;GO:0031091,platelet alpha granule;GO:0044422,organelle part;GO:0032991,macromolecular complex;GO:0043226,organelle;GO:0044446,intracellular organelle part;GO:0043227,mem…	GO:0030414,peptidase inhibitor activity;GO:0005509,calcium ion binding;GO:0046872,metal ion binding;GO:0005515,protein binding;GO:0004857,enzyme inhibitor activity;GO:0043169,cation binding;GO:0043167,ion binding;GO:0032403,protein complex binding;GO:0030234,enzyme regulator activity;GO:0005488,binding;GO:0004866,endopeptidase inhibitor activity	ko04610,Complement and coagulation cascades
34	sp|P20742|PZP_HUMAN	Pregnancy zone protein OS=Homo sapiens OX=9606 GN=PZP PE=1 SV=4	up	2.76209	0.00126339	immune system process;positive regulation of biological process;localization;response to stimulus;cellular process;biological regulation;developmental process;signaling;negative regulation of biological process;metabolic process;cellular component organization or biogenesis;regulation of biological process;multicellular organismal process;establishment of localization	organelle;organelle part;cell part;extracellular region part;extracellular region;cell;membrane-enclosed lumen	enzyme regulator activity;binding	General function prediction only ;	Complement and coagulation cascades	GO:0022617,extracellular matrix disassembly;GO:0009605,response to external stimulus;GO:0051248,negative regulation of protein metabolic process;GO:0045916,negative regulation of complement activation;GO:0032940,secretion by cell;GO:0051246,regulation of protein metabolic process;GO:0050896,response to stimulus;GO:0065009,regulation of molecular function;GO:0048585,negative regulation of response…	GO:0005576,extracellular region;GO:0060205,cytoplasmic membrane-bounded vesicle lumen;GO:0030141,secretory granule;GO:0044421,extracellular region part;GO:0031988,membrane-bounded vesicle;GO:0044446,intracellular organelle part;GO:0043227,membrane-bounded organelle;GO:0065010,extracellular membrane-bounded organelle;GO:0043226,organelle;GO:0005737,cytoplasm;GO:0043229,intracellular organelle;GO:0…	GO:0043120,tumor necrosis factor binding;GO:0030414,peptidase inhibitor activity;GO:0004867,serine-type endopeptidase inhibitor activity;GO:0019899,enzyme binding;GO:0019838,growth factor binding;GO:0030234,enzyme regulator activity;GO:0005488,binding;GO:0004866,endopeptidase inhibitor activity;GO:0019956,chemokine binding;GO:0005515,protein binding;GO:0019959,interleukin-8 binding;GO:0019955,cyt…	ko04610,Complement and coagulation cascades
47	sp|P02774|VTDB_HUMAN	Vitamin D-binding protein OS=Homo sapiens OX=9606 GN=GC PE=1 SV=2	down	0.219976	0.00172045	biological regulation;developmental process;response to stimulus;localization;establishment of localization;reproductive process;multicellular organismal process;reproduction;multi-organism process;metabolic process	organelle;organelle part;cell;extracellular region;extracellular region part;cell part;membrane-enclosed lumen	transporter activity;binding			GO:0009605,response to external stimulus;GO:0032501,multicellular organismal process;GO:0006810,transport;GO:0043627,response to estrogen stimulus;GO:0032355,response to estradiol stimulus;GO:0031667,response to nutrient levels;GO:0006766,vitamin metabolic process;GO:0008152,metabolic process;GO:0009987,cellular process;GO:0050896,response to stimulus;GO:0048545,response to steroid hormone stimul…	GO:0070062,extracellular vesicular exosome;GO:0048471,perinuclear region of cytoplasm;GO:0044437,vacuolar part;GO:0044464,cell part;GO:0044422,organelle part;GO:0043226,organelle;GO:0044446,intracellular organelle part;GO:0043227,membrane-bounded organelle;GO:0005576,extracellular region;GO:0005829,cytosol;GO:0005622,intracellular;GO:0043233,organelle lumen;GO:0000323,lytic vacuole;GO:0043231,int…	GO:0008092,cytoskeletal protein binding;GO:0005515,protein binding;GO:0005215,transporter activity;GO:0005488,binding
3	sp|P0C0L4|CO4A_HUMAN	Complement C4-A OS=Homo sapiens OX=9606 GN=C4A PE=1 SV=2	up	4.32176	0.00182922	immune system process;biological regulation;cellular process;positive regulation of biological process;localization;response to stimulus;metabolic process;multi-organism process;regulation of biological process;establishment of localization;cellular component organization or biogenesis	cell;extracellular region part;cell part;extracellular region;organelle	enzyme regulator activity;binding	General function prediction only ;	Systemic lupus erythematosus;Staphylococcus aureus infection;Complement and coagulation cascades	GO:0006959,humoral immune response;GO:0070613,regulation of protein processing;GO:0051346,negative regulation of hydrolase activity;GO:0002253,activation of immune response;GO:0002920,regulation of humoral immune response;GO:0019538,protein metabolic process;GO:0048583,regulation of response to stimulus;GO:0031347,regulation of defense response;GO:0010466,negative regulation of peptidase activity…	GO:0005886,plasma membrane;GO:0031982,vesicle;GO:0044464,cell part;GO:0043230,extracellular organelle;GO:0043226,organelle;GO:0016020,membrane;GO:0070062,extracellular vesicular exosome;GO:0065010,extracellular membrane-bounded organelle;GO:0005623,cell;GO:0043227,membrane-bounded organelle;GO:0031988,membrane-bounded vesicle;GO:0005576,extracellular region;GO:0044421,extracellular region part	GO:0004857,enzyme inhibitor activity;GO:0005515,protein binding;GO:0005488,binding;GO:0004866,endopeptidase inhibitor activity;GO:0030234,enzyme regulator activity;GO:0030414,peptidase inhibitor activity;GO:0001848,complement binding;GO:0030246,carbohydrate binding	ko05150,Staphylococcus aureus infection;ko04610,Complement and coagulation cascades;ko05322,Systemic lupus erythematosus
110	sp|P01876|IGHA1_HUMAN	Immunoglobulin heavy constant alpha 1 OS=Homo sapiens OX=9606 GN=IGHA1 PE=1 SV=2	down	0.215412	0.00185644	signaling;multi-organism process;metabolic process;cellular component organization or biogenesis;establishment of localization;multicellular organismal process;regulation of biological process;immune system process;response to stimulus;positive regulation of biological process;localization;cellular process;biological regulation	cell part;extracellular region part;extracellular region;cell;macromolecular complex;organelle	binding		Fc gamma R-mediated phagocytosis;Asthma;Viral myocarditis;Dilated cardiomyopathy;Intestinal immune network for IgA production;Allograft rejection;Amoebiasis;Primary immunodeficiency;Fc epsilon RI signaling pathway;Leishmaniasis;Natural killer cell mediated cytotoxicity;Systemic lupus erythematosus;Autoimmune thyroid disease;Phagosome;Staphylococcus aureus infection;Calcium signaling pathway;B cel…	GO:0002757,immune response-activating signal transduction;GO:0016044,membrane organization;GO:0009617,response to bacterium;GO:0050865,regulation of cell activation;GO:0002696,positive regulation of leukocyte activation;GO:0050789,regulation of biological process;GO:0002250,adaptive immune response;GO:0006950,response to stress;GO:0051707,response to other organism;GO:0002764,immune response-regu…	GO:0031982,vesicle;GO:0005576,extracellular region;GO:0044421,extracellular region part;GO:0031988,membrane-bounded vesicle;GO:0043227,membrane-bounded organelle;GO:0009986,cell surface;GO:0065010,extracellular membrane-bounded organelle;GO:0043226,organelle;GO:0016020,membrane;GO:0044459,plasma membrane part;GO:0043230,extracellular organelle;GO:0044464,cell part;GO:0044425,membrane part;GO:0005…	GO:0034987,immunoglobulin receptor binding;GO:0003823,antigen binding;GO:0005488,binding;GO:0005102,receptor binding;GO:0005515,protein binding	ko05414,Dilated cardiomyopathy;ko04664,Fc epsilon RI signaling pathway;ko05310,Asthma;ko04145,Phagosome;ko05340,Primary immunodeficiency;ko04662,B cell receptor signaling pathway;ko05320,Autoimmune thyroid disease;ko05140,Leishmaniasis;ko04672,Intestinal immune network for IgA production;ko05150,Staphylococcus aureus infection;ko05416,Viral myocarditis;ko04020,Calcium signaling pathway;ko05322,Sy…
15	sp|P01023|A2MG_HUMAN	Alpha-2-macroglobulin OS=Homo sapiens OX=9606 GN=A2M PE=1 SV=3	down	0.0976739	0.00213268	signaling;negative regulation of biological process;metabolic process;cellular component organization or biogenesis;multicellular organismal process;regulation of biological process;establishment of localization;immune system process;localization;positive regulation of biological process;response to stimulus;biological regulation;developmental process;cellular process	organelle;organelle part;cell;cell part;extracellular region part;extracellular region;membrane-enclosed lumen	binding;enzyme regulator activity	General function prediction only ;	Complement and coagulation cascades	GO:0030162,regulation of proteolysis;GO:0007599,hemostasis;GO:0009966,regulation of signal transduction;GO:0010646,regulation of cell communication;GO:0080134,regulation of response to stress;GO:0030198,extracellular matrix organization;GO:0009894,regulation of catabolic process;GO:0043086,negative regulation of catalytic activity;GO:0045861,negative regulation of proteolysis;GO:0080090,regulatio…	GO:0044424,intracellular part;GO:0044433,cytoplasmic vesicle part;GO:0005623,cell;GO:0016023,cytoplasmic membrane-bounded vesicle;GO:0031974,membrane-enclosed lumen;GO:0070062,extracellular vesicular exosome;GO:0044422,organelle part;GO:0031091,platelet alpha granule;GO:0044444,cytoplasmic part;GO:0031410,cytoplasmic vesicle;GO:0044464,cell part;GO:0043230,extracellular organelle;GO:0005576,extra…	GO:0048306,calcium-dependent protein binding;GO:0005102,receptor binding;GO:0019966,interleukin-1 binding;GO:0004857,enzyme inhibitor activity;GO:0002020,protease binding;GO:0019958,C-X-C chemokine binding;GO:0019955,cytokine binding;GO:0004866,endopeptidase inhibitor activity;GO:0005488,binding;GO:0019956,chemokine binding;GO:0019838,growth factor binding;GO:0019899,enzyme binding;GO:0030234,enz…	ko04610,Complement and coagulation cascades
118	sp|P04217|A1BG_HUMAN	Alpha-1B-glycoprotein OS=Homo sapiens OX=9606 GN=A1BG PE=1 SV=4	down	0.363337	0.00216466		organelle;extracellular region part;extracellular region			B cell receptor signaling pathway		GO:0043230,extracellular organelle;GO:0031982,vesicle;GO:0031988,membrane-bounded vesicle;GO:0043227,membrane-bounded organelle;GO:0005576,extracellular region;GO:0044421,extracellular region part;GO:0043226,organelle;GO:0070062,extracellular vesicular exosome;GO:0065010,extracellular membrane-bounded organelle		ko04662,B cell receptor signaling pathway
27	sp|P02748|CO9_HUMAN	Complement component C9 OS=Homo sapiens OX=9606 GN=C9 PE=1 SV=2	up	1.98816	0.00219992	positive regulation of biological process;response to stimulus;biological regulation;immune system process;cell killing;regulation of biological process;metabolic process;multi-organism process	macromolecular complex;cell;extracellular region;extracellular region part;cell part;organelle			Amoebiasis;Systemic lupus erythematosus;Complement and coagulation cascades;Prion diseases	GO:0009894,regulation of catabolic process;GO:0016485,protein processing;GO:0044419,interspecies interaction between organisms;GO:0080134,regulation of response to stress;GO:0002443,leukocyte mediated immunity;GO:0051704,multi-organism process;GO:0030162,regulation of proteolysis;GO:0051604,protein maturation;GO:0080090,regulation of primary metabolic process;GO:0050794,regulation of cellular pro…	GO:0005886,plasma membrane;GO:0044425,membrane part;GO:0043230,extracellular organelle;GO:0044464,cell part;GO:0044459,plasma membrane part;GO:0070062,extracellular vesicular exosome;GO:0016021,integral to membrane;GO:0005623,cell;GO:0044424,intracellular part;GO:0031224,intrinsic to membrane;GO:0005622,intracellular;GO:0031982,vesicle;GO:0032991,macromolecular complex;GO:0016020,membrane;GO:0043…		ko05020,Prion diseases;ko04610,Complement and coagulation cascades;ko05322,Systemic lupus erythematosus;ko05146,Amoebiasis
201	sp|P0DOX6|IGM_HUMAN	Immunoglobulin mu heavy chain OS=Homo sapiens OX=9606 PE=1 SV=2	down	0.180181	0.00236078					B cell receptor signaling pathway;Hematopoietic cell lineage;Calcium signaling pathway;Phagosome;Staphylococcus aureus infection;Systemic lupus erythematosus;Autoimmune thyroid disease;Leishmaniasis;Natural killer cell mediated cytotoxicity;Primary immunodeficiency;Fc epsilon RI signaling pathway;Allograft rejection;Amoebiasis;Dilated cardiomyopathy;Intestinal immune network for IgA production;Vi…				ko04662,B cell receptor signaling pathway;ko05340,Primary immunodeficiency;ko05140,Leishmaniasis;ko05320,Autoimmune thyroid disease;ko04664,Fc epsilon RI signaling pathway;ko05414,Dilated cardiomyopathy;ko05310,Asthma;ko04145,Phagosome;ko04666,Fc gamma R-mediated phagocytosis;ko05146,Amoebiasis;ko04640,Hematopoietic cell lineage;ko04650,Natural killer cell mediated cytotoxicity;ko04020,Calcium si…
145	sp|P69905|HBA_HUMAN	Hemoglobin subunit alpha OS=Homo sapiens OX=9606 GN=HBA1 PE=1 SV=2	down	0.0367015	0.00253779	death;metabolic process;establishment of localization;regulation of biological process;cellular component organization or biogenesis;cellular process;biological regulation;response to stimulus;positive regulation of biological process;localization	macromolecular complex;cell;extracellular region;extracellular region part;cell part;membrane-enclosed lumen;organelle;organelle part	transporter activity;antioxidant activity;binding;catalytic activity		Malaria	GO:0008152,metabolic process;GO:0006979,response to oxidative stress;GO:0042743,hydrogen peroxide metabolic process;GO:0006810,transport;GO:0009056,catabolic process;GO:0042221,response to chemical stimulus;GO:0006800,oxygen and reactive oxygen species metabolic process;GO:0044237,cellular metabolic process;GO:0044248,cellular catabolic process;GO:0065007,biological regulation;GO:0051234,establis…	GO:0044464,cell part;GO:0043230,extracellular organelle;GO:0044444,cytoplasmic part;GO:0044422,organelle part;GO:0005833,hemoglobin complex;GO:0030529,ribonucleoprotein complex;GO:0031838,haptoglobin-hemoglobin complex;GO:0005623,cell;GO:0044424,intracellular part;GO:0070062,extracellular vesicular exosome;GO:0043228,non-membrane-bounded organelle;GO:0005622,intracellular;GO:0005829,cytosol;GO:00…	GO:0043167,ion binding;GO:0046906,tetrapyrrole binding;GO:0031720,haptoglobin binding;GO:0016491,oxidoreductase activity;GO:0046914,transition metal ion binding;GO:0016684,oxidoreductase activity, acting on peroxide as acceptor;GO:0022892,substrate-specific transporter activity;GO:0046872,metal ion binding;GO:0043169,cation binding;GO:0016209,antioxidant activity;GO:0005515,protein binding;GO:000…	ko05144,Malaria
17	sp|P04275|VWF_HUMAN	von Willebrand factor OS=Homo sapiens OX=9606 GN=VWF PE=1 SV=4	up	1.79092	0.0027934	response to stimulus;biological adhesion;cellular component organization or biogenesis;biological regulation;cellular process;multicellular organismal process	extracellular region;extracellular region part;cell part;cell;organelle	binding		ECM-receptor interaction;Complement and coagulation cascades;Focal adhesion	GO:0007599,hemostasis;GO:0065007,biological regulation;GO:0030168,platelet activation;GO:0009611,response to wounding;GO:0051260,protein homooligomerization;GO:0065008,regulation of biological quality;GO:0009987,cellular process;GO:0050896,response to stimulus;GO:0070271,protein complex biogenesis;GO:0001775,cell activation;GO:0031589,cell-substrate adhesion;GO:0009605,response to external stimul…	GO:0044444,cytoplasmic part;GO:0030135,coated vesicle;GO:0044464,cell part;GO:0031410,cytoplasmic vesicle;GO:0044424,intracellular part;GO:0031012,extracellular matrix;GO:0005623,cell;GO:0016023,cytoplasmic membrane-bounded vesicle;GO:0005578,proteinaceous extracellular matrix;GO:0043231,intracellular membrane-bounded organelle;GO:0031982,vesicle;GO:0005622,intracellular;GO:0005576,extracellular …	GO:0032403,protein complex binding;GO:0005518,collagen binding;GO:0005515,protein binding;GO:0047485,protein N-terminus binding;GO:0019899,enzyme binding;GO:0001948,glycoprotein binding;GO:0046983,protein dimerization activity;GO:0005488,binding;GO:0042803,protein homodimerization activity;GO:0005102,receptor binding;GO:0002020,protease binding;GO:0005178,integrin binding;GO:0051087,chaperone bin…	ko04510,Focal adhesion;ko04610,Complement and coagulation cascades;ko04512,ECM-receptor interaction
64	sp|P13645|K1C10_HUMAN	"Keratin, type I cytoskeletal 10 OS=Homo sapiens OX=9606 GN=KRT10 PE=1 SV=6"	up	4.13509	0.00286282	response to stimulus;developmental process;cellular process;multicellular organismal process	organelle;organelle part;macromolecular complex;cell;extracellular region part;extracellular region;cell part	structural molecule activity		Pathogenic Escherichia coli infection;Staphylococcus aureus infection	GO:0048869,cellular developmental process;GO:0030154,cell differentiation;GO:0009987,cellular process;GO:0032502,developmental process	GO:0043228,non-membrane-bounded organelle;GO:0031982,vesicle;GO:0043231,intracellular membrane-bounded organelle;GO:0005622,intracellular;GO:0044421,extracellular region part;GO:0005576,extracellular region;GO:0044446,intracellular organelle part;GO:0031988,membrane-bounded vesicle;GO:0043227,membrane-bounded organelle;GO:0044430,cytoskeletal part;GO:0065010,extracellular membrane-bounded organel…	GO:0005198,structural molecule activity	ko05150,Staphylococcus aureus infection;ko05130,Pathogenic Escherichia coli infection
287	sp|P80748|LV321_HUMAN	Immunoglobulin lambda variable 3-21 OS=Homo sapiens OX=9606 GN=IGLV3-21 PE=1 SV=2	down	0.505782	0.00314182					Primary immunodeficiency				ko05340,Primary immunodeficiency
19	sp|P07996|TSP1_HUMAN	Thrombospondin-1 OS=Homo sapiens OX=9606 GN=THBS1 PE=1 SV=2	up	2.53122	0.00360216	cellular component organization or biogenesis;establishment of localization;negative regulation of biological process;metabolic process;death;positive regulation of biological process;localization;biological regulation;developmental process;locomotion;cell proliferation;biological adhesion;regulation of biological process;multicellular organismal process;signaling;response to stimulus;cellular pr…	organelle;organelle part;extracellular region;extracellular region part;cell part;membrane-enclosed lumen;cell;macromolecular complex	binding		p53 signaling pathway;Phagosome;ECM-receptor interaction;Focal adhesion;Malaria;TGF-beta signaling pathway;Bladder cancer	GO:0009893,positive regulation of metabolic process;GO:0007050,cell cycle arrest;GO:0006955,immune response;GO:0042981,regulation of apoptosis;GO:0050817,coagulation;GO:0060255,regulation of macromolecule metabolic process;GO:0010605,negative regulation of macromolecule metabolic process;GO:0009611,response to wounding;GO:0031325,positive regulation of cellular metabolic process;GO:0019222,regula…	GO:0070062,extracellular vesicular exosome;GO:0009897,external side of plasma membrane;GO:0016023,cytoplasmic membrane-bounded vesicle;GO:0044432,endoplasmic reticulum part;GO:0005577,fibrinogen complex;GO:0044425,membrane part;GO:0044464,cell part;GO:0031091,platelet alpha granule;GO:0044459,plasma membrane part;GO:0044422,organelle part;GO:0032991,macromolecular complex;GO:0043226,organelle;GO:…	GO:0030247,polysaccharide binding;GO:0008289,lipid binding;GO:0019955,cytokine binding;GO:0046872,metal ion binding;GO:0005178,integrin binding;GO:0005102,receptor binding;GO:0030169,low-density lipoprotein binding;GO:0005518,collagen binding;GO:0032403,protein complex binding;GO:0043167,ion binding;GO:0005509,calcium ion binding;GO:0042802,identical protein binding;GO:0030246,carbohydrate bindin…	ko05144,Malaria;ko04115,p53 signaling pathway;ko04145,Phagosome;ko04350,TGF-beta signaling pathway;ko05219,Bladder cancer;ko04510,Focal adhesion;ko04512,ECM-receptor interaction
138	sp|P02655|APOC2_HUMAN	Apolipoprotein C-II OS=Homo sapiens OX=9606 GN=APOC2 PE=1 SV=1	up	8.58666	0.00379886	response to stimulus;positive regulation of biological process;localization;biological regulation;cellular process;cellular component organization or biogenesis;establishment of localization;regulation of biological process;multicellular organismal process;negative regulation of biological process;signaling;metabolic process	organelle;extracellular region part;extracellular region;cell part;macromolecular complex;cell	enzyme regulator activity;binding			GO:0009889,regulation of biosynthetic process;GO:0043170,macromolecule metabolic process;GO:0048523,negative regulation of cellular process;GO:0019748,secondary metabolic process;GO:0034381,lipoprotein particle clearance;GO:0022411,cellular component disassembly;GO:0030100,regulation of endocytosis;GO:0006629,lipid metabolic process;GO:0051179,localization;GO:0031328,positive regulation of cellul…	GO:0031988,membrane-bounded vesicle;GO:0043227,membrane-bounded organelle;GO:0034361,very-low-density lipoprotein particle;GO:0032994,protein-lipid complex;GO:0044421,extracellular region part;GO:0005576,extracellular region;GO:0032991,macromolecular complex;GO:0042627,chylomicron;GO:0043226,organelle;GO:0005737,cytoplasm;GO:0043229,intracellular organelle;GO:0065010,extracellular membrane-bounde…	GO:0008289,lipid binding;GO:0060229,lipase activator activity;GO:0042802,identical protein binding;GO:0060230,lipoprotein lipase activator activity;GO:0019899,enzyme binding;GO:0046983,protein dimerization activity;GO:0030234,enzyme regulator activity;GO:0042803,protein homodimerization activity;GO:0005488,binding;GO:0008047,enzyme activator activity;GO:0043274,phospholipase binding;GO:0005515,pr…
204	sp|P02763|A1AG1_HUMAN	Alpha-1-acid glycoprotein 1 OS=Homo sapiens OX=9606 GN=ORM1 PE=1 SV=1	down	0.183248	0.00383063	establishment of localization;regulation of biological process;multicellular organismal process;negative regulation of biological process;biological regulation;response to stimulus;localization;immune system process	organelle;extracellular region;extracellular region part	binding			GO:0048519,negative regulation of biological process;GO:0032675,regulation of interleukin-6 production;GO:0051239,regulation of multicellular organismal process;GO:0006952,defense response;GO:0051241,negative regulation of multicellular organismal process;GO:0002682,regulation of immune system process;GO:0006950,response to stress;GO:0050789,regulation of biological process;GO:0006954,inflammator…	GO:0043227,membrane-bounded organelle;GO:0031988,membrane-bounded vesicle;GO:0005576,extracellular region;GO:0044421,extracellular region part;GO:0043226,organelle;GO:0070062,extracellular vesicular exosome;GO:0065010,extracellular membrane-bounded organelle;GO:0043230,extracellular organelle;GO:0031982,vesicle	GO:0005488,binding;GO:0005515,protein binding
59	sp|P00488|F13A_HUMAN	Coagulation factor XIII A chain OS=Homo sapiens OX=9606 GN=F13A1 PE=1 SV=4	up	3.06746	0.00386194	metabolic process;biological regulation;establishment of localization;cellular process;multicellular organismal process;response to stimulus;localization	membrane-enclosed lumen;extracellular region;extracellular region part;cell part;cell;organelle part;organelle	binding;catalytic activity		Complement and coagulation cascades	GO:0009611,response to wounding;GO:0007599,hemostasis;GO:0065008,regulation of biological quality;GO:0009987,cellular process;GO:0034960,cellular biopolymer metabolic process;GO:0050817,coagulation;GO:0007596,blood coagulation;GO:0051641,cellular localization;GO:0006887,exocytosis;GO:0051649,establishment of localization in cell;GO:0002576,platelet degranulation;GO:0046903,secretion;GO:0044238,pr…	GO:0044424,intracellular part;GO:0044433,cytoplasmic vesicle part;GO:0005623,cell;GO:0016023,cytoplasmic membrane-bounded vesicle;GO:0031974,membrane-enclosed lumen;GO:0044422,organelle part;GO:0044444,cytoplasmic part;GO:0031091,platelet alpha granule;GO:0031410,cytoplasmic vesicle;GO:0044464,cell part;GO:0030141,secretory granule;GO:0060205,cytoplasmic membrane-bounded vesicle lumen;GO:0031988,…	GO:0005488,binding;GO:0046872,metal ion binding;GO:0003824,catalytic activity;GO:0043167,ion binding;GO:0016740,transferase activity;GO:0043169,cation binding	ko04610,Complement and coagulation cascades
149	sp|P02675|FIBB_HUMAN	Fibrinogen beta chain OS=Homo sapiens OX=9606 GN=FGB PE=1 SV=2	up	1.68529	0.00577078	immune system process;response to stimulus;cellular process;signaling;multi-organism process;biological adhesion;regulation of biological process;multicellular organismal process;localization;positive regulation of biological process;biological regulation;developmental process;negative regulation of biological process;death;metabolic process;cellular component organization or biogenesis;establish…	cell part;extracellular region part;extracellular region;membrane-enclosed lumen;organelle;organelle part;macromolecular complex;cell	binding;structural molecule activity		Complement and coagulation cascades	GO:0051604,protein maturation;GO:0051050,positive regulation of transport;GO:0017157,regulation of exocytosis;GO:0043410,positive regulation of MAPKKK cascade;GO:0080134,regulation of response to stress;GO:0030198,extracellular matrix organization;GO:0007599,hemostasis;GO:0051046,regulation of secretion;GO:0051704,multi-organism process;GO:0032101,regulation of response to external stimulus;GO:00…	GO:0031093,platelet alpha granule lumen;GO:0031983,vesicle lumen;GO:0043229,intracellular organelle;GO:0005737,cytoplasm;GO:0016020,membrane;GO:0065010,extracellular membrane-bounded organelle;GO:0031988,membrane-bounded vesicle;GO:0044421,extracellular region part;GO:0005886,plasma membrane;GO:0044444,cytoplasmic part;GO:0043230,extracellular organelle;GO:0031410,cytoplasmic vesicle;GO:0005623,c…	GO:0005515,protein binding;GO:0050839,cell adhesion molecule binding;GO:0030674,protein binding, bridging;GO:0005488,binding;GO:0005102,receptor binding;GO:0051087,chaperone binding;GO:0005198,structural molecule activity	ko04610,Complement and coagulation cascades
94	sp|P02776|PLF4_HUMAN	Platelet factor 4 OS=Homo sapiens OX=9606 GN=PF4 PE=1 SV=2	down	0.276133	0.0058895	signaling;multi-organism process;cell proliferation;regulation of biological process;multicellular organismal process;immune system process;response to stimulus;cellular process;negative regulation of biological process;death;metabolic process;establishment of localization;locomotion;localization;positive regulation of biological process;biological regulation;developmental process	organelle;organelle part;extracellular region;extracellular region part;cell part;cell;membrane-enclosed lumen	binding		Chemokine signaling pathway;Cytokine-cytokine receptor interaction	GO:0007166,cell surface receptor linked signal transduction;GO:0007186,G-protein coupled receptor protein signaling pathway;GO:0009892,negative regulation of metabolic process;GO:0050793,regulation of developmental process;GO:0031325,positive regulation of cellular metabolic process;GO:0009611,response to wounding;GO:0019222,regulation of metabolic process;GO:0048518,positive regulation of biolog…	GO:0031091,platelet alpha granule;GO:0044444,cytoplasmic part;GO:0031410,cytoplasmic vesicle;GO:0044464,cell part;GO:0044422,organelle part;GO:0005623,cell;GO:0031974,membrane-enclosed lumen;GO:0016023,cytoplasmic membrane-bounded vesicle;GO:0044424,intracellular part;GO:0005615,extracellular space;GO:0044433,cytoplasmic vesicle part;GO:0031093,platelet alpha granule lumen;GO:0031983,vesicle lume…	GO:0008201,heparin binding;GO:0001871,pattern binding;GO:0005515,protein binding;GO:0005125,cytokine activity;GO:0005488,binding;GO:0005102,receptor binding;GO:0005539,glycosaminoglycan binding;GO:0001664,G-protein-coupled receptor binding;GO:0030246,carbohydrate binding;GO:0030247,polysaccharide binding	ko04062,Chemokine signaling pathway;ko04060,Cytokine-cytokine receptor interaction
73	sp|P05546|HEP2_HUMAN	Heparin cofactor 2 OS=Homo sapiens OX=9606 GN=SERPIND1 PE=1 SV=3	up	1.69067	0.0059905	locomotion;metabolic process;response to stimulus;biological regulation;cellular process;multicellular organismal process;regulation of biological process	organelle;extracellular region;extracellular region part	binding;enzyme regulator activity	Posttranslational modification, protein turnover, chaperones ;	Complement and coagulation cascades	GO:0052547,regulation of peptidase activity;GO:0007610,behavior;GO:0007626,locomotory behavior;GO:0050790,regulation of catalytic activity;GO:0010466,negative regulation of peptidase activity;GO:0006950,response to stress;GO:0010951,negative regulation of endopeptidase activity;GO:0006935,chemotaxis;GO:0042060,wound healing;GO:0051346,negative regulation of hydrolase activity;GO:0044092,negative …	GO:0043230,extracellular organelle;GO:0031982,vesicle;GO:0044421,extracellular region part;GO:0005576,extracellular region;GO:0005615,extracellular space;GO:0043227,membrane-bounded organelle;GO:0031988,membrane-bounded vesicle;GO:0065010,extracellular membrane-bounded organelle;GO:0070062,extracellular vesicular exosome;GO:0043226,organelle	GO:0005539,glycosaminoglycan binding;GO:0004867,serine-type endopeptidase inhibitor activity;GO:0030414,peptidase inhibitor activity;GO:0030247,polysaccharide binding;GO:0030246,carbohydrate binding;GO:0001871,pattern binding;GO:0004857,enzyme inhibitor activity;GO:0008201,heparin binding;GO:0005488,binding;GO:0004866,endopeptidase inhibitor activity;GO:0030234,enzyme regulator activity	ko04610,Complement and coagulation cascades
154	sp|P02679|FIBG_HUMAN	Fibrinogen gamma chain OS=Homo sapiens OX=9606 GN=FGG PE=1 SV=3	up	1.76542	0.00609195	signaling;negative regulation of biological process;metabolic process;death;cellular component organization or biogenesis;biological adhesion;regulation of biological process;multicellular organismal process;establishment of localization;positive regulation of biological process;localization;response to stimulus;developmental process;cellular process;biological regulation	macromolecular complex;cell;organelle part;organelle;membrane-enclosed lumen;extracellular region part;extracellular region;cell part	structural molecule activity;binding		Staphylococcus aureus infection;Complement and coagulation cascades	GO:0043170,macromolecule metabolic process;GO:0031638,zymogen activation;GO:0044085,cellular component biogenesis;GO:0034109,homotypic cell-cell adhesion;GO:0065003,macromolecular complex assembly;GO:0031639,plasminogen activation;GO:0030193,regulation of blood coagulation;GO:0034621,cellular macromolecular complex subunit organization;GO:0043408,regulation of MAPKKK cascade;GO:0051239,regulation…	GO:0044433,cytoplasmic vesicle part;GO:0044424,intracellular part;GO:0005615,extracellular space;GO:0031974,membrane-enclosed lumen;GO:0005623,cell;GO:0005886,plasma membrane;GO:0031410,cytoplasmic vesicle;GO:0043230,extracellular organelle;GO:0044444,cytoplasmic part;GO:0065010,extracellular membrane-bounded organelle;GO:0016020,membrane;GO:0043229,intracellular organelle;GO:0005737,cytoplasm;GO…	GO:0005515,protein binding;GO:0043167,ion binding;GO:0043169,cation binding;GO:0030674,protein binding, bridging;GO:0005102,receptor binding;GO:0005488,binding;GO:0005198,structural molecule activity;GO:0050839,cell adhesion molecule binding;GO:0046872,metal ion binding	ko04610,Complement and coagulation cascades;ko05150,Staphylococcus aureus infection
158	sp|P0C0L5|CO4B_HUMAN	Complement C4-B OS=Homo sapiens OX=9606 GN=C4B PE=1 SV=2	up	7.57397	0.00609703	cellular process;biological regulation;positive regulation of biological process;localization;response to stimulus;immune system process;regulation of biological process;establishment of localization;cellular component organization or biogenesis;metabolic process;multi-organism process	organelle;cell;extracellular region part;cell part;extracellular region	binding;enzyme regulator activity	General function prediction only ;	Systemic lupus erythematosus;Staphylococcus aureus infection;Complement and coagulation cascades	GO:0002541,activation of plasma proteins involved in acute inflammatory response;GO:0002697,regulation of immune effector process;GO:0006954,inflammatory response;GO:0010953,regulation of protein maturation by peptide bond cleavage;GO:0042176,regulation of protein catabolic process;GO:0016043,cellular component organization;GO:0045087,innate immune response;GO:0010467,gene expression;GO:0044092,n…	GO:0065010,extracellular membrane-bounded organelle;GO:0016020,membrane;GO:0070062,extracellular vesicular exosome;GO:0043226,organelle;GO:0044421,extracellular region part;GO:0005576,extracellular region;GO:0043227,membrane-bounded organelle;GO:0031988,membrane-bounded vesicle;GO:0005623,cell;GO:0031982,vesicle;GO:0005886,plasma membrane;GO:0044464,cell part;GO:0043230,extracellular organelle	GO:0030414,peptidase inhibitor activity;GO:0001848,complement binding;GO:0030246,carbohydrate binding;GO:0005515,protein binding;GO:0004857,enzyme inhibitor activity;GO:0030234,enzyme regulator activity;GO:0005488,binding;GO:0004866,endopeptidase inhibitor activity	ko05150,Staphylococcus aureus infection;ko04610,Complement and coagulation cascades;ko05322,Systemic lupus erythematosus
160	sp|P35542|SAA4_HUMAN	Serum amyloid A-4 protein OS=Homo sapiens OX=9606 GN=SAA4 PE=1 SV=2	down	0.561807	0.00619708	regulation of biological process;metabolic process;signaling;negative regulation of biological process;cellular process;biological regulation;localization;positive regulation of biological process;response to stimulus;locomotion	organelle;extracellular region part;extracellular region;macromolecular complex	chemoattractant activity			GO:0009611,response to wounding;GO:0031325,positive regulation of cellular metabolic process;GO:0019222,regulation of metabolic process;GO:0032270,positive regulation of cellular protein metabolic process;GO:0048518,positive regulation of biological process;GO:0045892,negative regulation of transcription, DNA-dependent;GO:0009987,cellular process;GO:0009893,positive regulation of metabolic proces…	GO:0031982,vesicle;GO:0034358,plasma lipoprotein particle;GO:0043230,extracellular organelle;GO:0043226,organelle;GO:0032991,macromolecular complex;GO:0070062,extracellular vesicular exosome;GO:0065010,extracellular membrane-bounded organelle;GO:0034364,high-density lipoprotein particle;GO:0032994,protein-lipid complex;GO:0043227,membrane-bounded organelle;GO:0031988,membrane-bounded vesicle;GO:0…
78	sp|P02743|SAMP_HUMAN	Serum amyloid P-component OS=Homo sapiens OX=9606 GN=APCS PE=1 SV=2	up	2.31921	0.00644554	cellular component organization or biogenesis;reproduction;regulation of biological process;reproductive process;multicellular organismal process;viral reproduction;negative regulation of biological process;metabolic process;multi-organism process;response to stimulus;cellular process;biological regulation;developmental process;immune system process;locomotion	organelle;extracellular region part;extracellular region;cell part;cell	binding		Proximal tubule bicarbonate reclamation;Pancreatic secretion;Collecting duct acid secretion;Nitrogen metabolism;Gastric acid secretion	GO:0048525,negative regulation of viral reproduction;GO:0080134,regulation of response to stress;GO:0034960,cellular biopolymer metabolic process;GO:0051093,negative regulation of developmental process;GO:0043933,macromolecular complex subunit organization;GO:0043903,regulation of symbiosis, encompassing mutualism through parasitism;GO:0045637,regulation of myeloid cell differentiation;GO:0045638…	GO:0031982,vesicle;GO:0043231,intracellular membrane-bounded organelle;GO:0005622,intracellular;GO:0065010,extracellular membrane-bounded organelle;GO:0043229,intracellular organelle;GO:0043226,organelle;GO:0044421,extracellular region part;GO:0005576,extracellular region;GO:0043227,membrane-bounded organelle;GO:0031988,membrane-bounded vesicle;GO:0044464,cell part;GO:0043230,extracellular organe…	GO:0001849,complement component C1q binding;GO:0005515,protein binding;GO:0043167,ion binding;GO:0043169,cation binding;GO:0005488,binding;GO:0046790,virion binding;GO:0001846,opsonin binding;GO:0005509,calcium ion binding;GO:0001848,complement binding;GO:0046872,metal ion binding;GO:0030246,carbohydrate binding	ko04971,Gastric acid secretion;ko00910,Nitrogen metabolism;ko04966,Collecting duct acid secretion;ko04972,Pancreatic secretion;ko04964,Proximal tubule bicarbonate reclamation
183	sp|P01860|IGHG3_HUMAN	Immunoglobulin heavy constant gamma 3 OS=Homo sapiens OX=9606 GN=IGHG3 PE=1 SV=2	down	0.199021	0.00753381	localization;positive regulation of biological process;response to stimulus;biological regulation;cellular process;immune system process;cellular component organization or biogenesis;multicellular organismal process;regulation of biological process;establishment of localization;signaling;metabolic process;multi-organism process	organelle;cell;macromolecular complex;cell part;extracellular region part;extracellular region	binding		Fc epsilon RI signaling pathway;Primary immunodeficiency;Natural killer cell mediated cytotoxicity;Leishmaniasis;Systemic lupus erythematosus;Autoimmune thyroid disease;Calcium signaling pathway;Phagosome;Staphylococcus aureus infection;Hematopoietic cell lineage;B cell receptor signaling pathway;Fc gamma R-mediated phagocytosis;Asthma;Viral myocarditis;Intestinal immune network for IgA productio…	GO:0002460,adaptive immune response based on somatic recombination of immune receptors built from immunoglobulin superfamily domains;GO:0009605,response to external stimulus;GO:0002252,immune effector process;GO:0048584,positive regulation of response to stimulus;GO:0050896,response to stimulus;GO:0050853,B cell receptor signaling pathway;GO:0006950,response to stress;GO:0051707,response to other…	GO:0065010,extracellular membrane-bounded organelle;GO:0019814,immunoglobulin complex;GO:0043226,organelle;GO:0032991,macromolecular complex;GO:0016020,membrane;GO:0005576,extracellular region;GO:0043234,protein complex;GO:0044421,extracellular region part;GO:0043227,membrane-bounded organelle;GO:0031988,membrane-bounded vesicle;GO:0009986,cell surface;GO:0031982,vesicle;GO:0009897,external side …	GO:0005515,protein binding;GO:0034987,immunoglobulin receptor binding;GO:0003823,antigen binding;GO:0005488,binding;GO:0005102,receptor binding	ko04672,Intestinal immune network for IgA production;ko05150,Staphylococcus aureus infection;ko05416,Viral myocarditis;ko04020,Calcium signaling pathway;ko05330,Allograft rejection;ko05322,Systemic lupus erythematosus;ko04640,Hematopoietic cell lineage;ko04666,Fc gamma R-mediated phagocytosis;ko05146,Amoebiasis;ko04650,Natural killer cell mediated cytotoxicity;ko04664,Fc epsilon RI signaling path…
210	sp|P62805|H4_HUMAN	Histone H4 OS=Homo sapiens OX=9606 GN=HIST1H4A PE=1 SV=2	down	0.491656	0.00758483	cellular component organization or biogenesis;regulation of biological process;multicellular organismal process;signaling;negative regulation of biological process;metabolic process;positive regulation of biological process;response to stimulus;biological regulation;cellular process;developmental process;immune system process	organelle;organelle part;extracellular region part;cell part;extracellular region;membrane-enclosed lumen;cell;macromolecular complex	binding;catalytic activity	Chromatin structure and dynamics ;	Systemic lupus erythematosus	GO:0001525,angiogenesis;GO:0050789,regulation of biological process;GO:0048514,blood vessel morphogenesis;GO:0010628,positive regulation of gene expression;GO:0033554,cellular response to stress;GO:0034622,cellular macromolecular complex assembly;GO:0010468,regulation of gene expression;GO:0040029,regulation of gene expression, epigenetic;GO:0031324,negative regulation of cellular metabolic proce…	GO:0043228,non-membrane-bounded organelle;GO:0070013,intracellular organelle lumen;GO:0000228,nuclear chromosome;GO:0031988,membrane-bounded vesicle;GO:0044421,extracellular region part;GO:0043229,intracellular organelle;GO:0016020,membrane;GO:0065010,extracellular membrane-bounded organelle;GO:0043230,extracellular organelle;GO:0000785,chromatin;GO:0005623,cell;GO:0031974,membrane-enclosed lumen…	GO:0031490,chromatin DNA binding;GO:0003682,chromatin binding;GO:0019904,protein domain specific binding;GO:0005488,binding;GO:0003677,DNA binding;GO:0046983,protein dimerization activity;GO:0043566,structure-specific DNA binding;GO:0005515,protein binding;GO:0003676,nucleic acid binding	ko05322,Systemic lupus erythematosus
76	sp|P60709|ACTB_HUMAN	"Actin, cytoplasmic 1 OS=Homo sapiens OX=9606 GN=ACTB PE=1 SV=1"	down	0.604733	0.00811438	immune system process;locomotion;response to stimulus;positive regulation of biological process;biological regulation;developmental process;cellular process;signaling;metabolic process;biological adhesion;cellular component organization or biogenesis;regulation of biological process;multicellular organismal process	membrane-enclosed lumen;extracellular region part;cell part;extracellular region;organelle part;organelle;macromolecular complex;cell	structural molecule activity;binding	Cytoskeleton ;	Regulation of actin cytoskeleton;Focal adhesion;Dilated cardiomyopathy;Gastric acid secretion;Viral myocarditis;Vibrio cholerae infection;Phototransduction - fly;Hypertrophic cardiomyopathy (HCM);Leukocyte transendothelial migration;Shigellosis;Arrhythmogenic right ventricular cardiomyopathy (ARVC);Adherens junction;Tight junction;Bacterial invasion of epithelial cells;Pathogenic Escherichia coli…	GO:0050878,regulation of body fluid levels;GO:0032501,multicellular organismal process;GO:0048871,multicellular organismal homeostasis;GO:0001775,cell activation;GO:0008152,metabolic process;GO:0051674,localization of cell;GO:0051179,localization;GO:0044237,cellular metabolic process;GO:0045815,positive regulation of gene expression, epigenetic;GO:0065007,biological regulation;GO:0030168,platelet…	GO:0000228,nuclear chromosome;GO:0070013,intracellular organelle lumen;GO:0043228,non-membrane-bounded organelle;GO:0016020,membrane;GO:0005737,cytoplasm;GO:0030055,cell-substrate junction;GO:0043229,intracellular organelle;GO:0065010,extracellular membrane-bounded organelle;GO:0031988,membrane-bounded vesicle;GO:0005925,focal adhesion;GO:0042995,cell projection;GO:0044421,extracellular region pa…	GO:0003682,chromatin binding;GO:0032553,ribonucleotide binding;GO:0000166,nucleotide binding;GO:0008134,transcription factor binding;GO:0032555,purine ribonucleotide binding;GO:0003677,DNA binding;GO:0008092,cytoskeletal protein binding;GO:0003676,nucleic acid binding;GO:0043566,structure-specific DNA binding;GO:0042802,identical protein binding;GO:0031490,chromatin DNA binding;GO:0005200,structu…	ko04520,Adherens junction;ko04670,Leukocyte transendothelial migration;ko05414,Dilated cardiomyopathy;ko04145,Phagosome;ko05110,Vibrio cholerae infection;ko04810,Regulation of actin cytoskeleton;ko04530,Tight junction;ko05131,Shigellosis;ko05410,Hypertrophic cardiomyopathy (HCM);ko05416,Viral myocarditis;ko04510,Focal adhesion;ko04745,Phototransduction - fly;ko04971,Gastric acid secretion;ko05130…
241	sp|Q12794|HYAL1_HUMAN	Hyaluronidase-1 OS=Homo sapiens OX=9606 GN=HYAL1 PE=1 SV=2	up	1.61525	0.00900649	cell proliferation;biological adhesion;regulation of biological process;multicellular organismal process;multi-organism process;response to stimulus;cellular process;growth;cellular component organization or biogenesis;negative regulation of biological process;metabolic process;localization;positive regulation of biological process;biological regulation;developmental process;locomotion	organelle;organelle part;cell;extracellular region;extracellular region part;cell part;membrane-enclosed lumen	catalytic activity;molecular transducer activity;binding		Metabolic pathways;Glycosaminoglycan degradation;Lysosome	GO:0048518,positive regulation of biological process;GO:0009987,cellular process;GO:0065008,regulation of biological quality;GO:0000272,polysaccharide catabolic process;GO:0009611,response to wounding;GO:0009790,embryonic development;GO:0045926,negative regulation of growth;GO:0006954,inflammatory response;GO:0009887,organ morphogenesis;GO:0009057,macromolecule catabolic process;GO:0009653,anatom…	GO:0043202,lysosomal lumen;GO:0044422,organelle part;GO:0044464,cell part;GO:0043230,extracellular organelle;GO:0031410,cytoplasmic vesicle;GO:0044444,cytoplasmic part;GO:0044437,vacuolar part;GO:0005615,extracellular space;GO:0044424,intracellular part;GO:0031974,membrane-enclosed lumen;GO:0005623,cell;GO:0005764,lysosome;GO:0070062,extracellular vesicular exosome;GO:0005775,vacuolar lumen;GO:00…	GO:0005488,binding;GO:0008134,transcription factor binding;GO:0060089,molecular transducer activity;GO:0004871,signal transducer activity;GO:0005515,protein binding;GO:0003824,catalytic activity;GO:0016798,hydrolase activity, acting on glycosyl bonds;GO:0004553,hydrolase activity, hydrolyzing O-glycosyl compounds;GO:0004872,receptor activity;GO:0016787,hydrolase activity;GO:0016740,transferase ac…	ko01100,Metabolic pathways;ko00531,Glycosaminoglycan degradation;ko04142,Lysosome
82	sp|O14791|APOL1_HUMAN	Apolipoprotein L1 OS=Homo sapiens OX=9606 GN=APOL1 PE=1 SV=5	up	2.17648	0.00912687	establishment of localization;cellular component organization or biogenesis;multi-organism process;death;metabolic process;cellular process;response to stimulus;localization;cell killing;immune system process	cell;macromolecular complex;extracellular region;extracellular region part;cell part	transporter activity;binding			GO:0006897,endocytosis;GO:0042157,lipoprotein metabolic process;GO:0006955,immune response;GO:0044255,cellular lipid metabolic process;GO:0006869,lipid transport;GO:0051704,multi-organism process;GO:0006066,alcohol metabolic process;GO:0009987,cellular process;GO:0044260,cellular macromolecule metabolic process;GO:0044238,primary metabolic process;GO:0010324,membrane invagination;GO:0045087,innat…	GO:0044464,cell part;GO:0034385,triglyceride-rich lipoprotein particle;GO:0034358,plasma lipoprotein particle;GO:0044425,membrane part;GO:0005623,cell;GO:0032994,protein-lipid complex;GO:0034361,very-low-density lipoprotein particle;GO:0044421,extracellular region part;GO:0005615,extracellular space;GO:0031224,intrinsic to membrane;GO:0005576,extracellular region;GO:0032991,macromolecular complex…	GO:0022857,transmembrane transporter activity;GO:0022892,substrate-specific transporter activity;GO:0005515,protein binding;GO:0022891,substrate-specific transmembrane transporter activity;GO:0005488,binding;GO:0005215,transporter activity;GO:0008289,lipid binding
196	sp|P55056|APOC4_HUMAN	Apolipoprotein C-IV OS=Homo sapiens OX=9606 GN=APOC4 PE=1 SV=1	up	1.82302	0.00923377	localization;positive regulation of biological process;establishment of localization;biological regulation;regulation of biological process;metabolic process	extracellular region;extracellular region part;macromolecular complex	transporter activity			GO:0065008,regulation of biological quality;GO:0051179,localization;GO:0048518,positive regulation of biological process;GO:0032879,regulation of localization;GO:0010883,regulation of lipid storage;GO:0065007,biological regulation;GO:0051234,establishment of localization;GO:0006810,transport;GO:0006869,lipid transport;GO:0008152,metabolic process;GO:0048878,chemical homeostasis;GO:0050789,regulat…	GO:0044421,extracellular region part;GO:0005576,extracellular region;GO:0005615,extracellular space;GO:0032994,protein-lipid complex;GO:0034361,very-low-density lipoprotein particle;GO:0034364,high-density lipoprotein particle;GO:0032991,macromolecular complex;GO:0034385,triglyceride-rich lipoprotein particle;GO:0034358,plasma lipoprotein particle	GO:0005215,transporter activity;GO:0022892,substrate-specific transporter activity;GO:0005319,lipid transporter activity
250	sp|P08185|CBG_HUMAN	Corticosteroid-binding globulin OS=Homo sapiens OX=9606 GN=SERPINA6 PE=1 SV=1	down	0.400902	0.00962852	biological regulation;establishment of localization;cellular process;regulation of biological process;localization;metabolic process	organelle;extracellular region;extracellular region part	binding;enzyme regulator activity	Posttranslational modification, protein turnover, chaperones ;	Complement and coagulation cascades	GO:0006810,transport;GO:0051336,regulation of hydrolase activity;GO:0008152,metabolic process;GO:0044249,cellular biosynthetic process;GO:0044255,cellular lipid metabolic process;GO:0051179,localization;GO:0043086,negative regulation of catalytic activity;GO:0009987,cellular process;GO:0065008,regulation of biological quality;GO:0065009,regulation of molecular function;GO:0052548,regulation of en…	GO:0043227,membrane-bounded organelle;GO:0031988,membrane-bounded vesicle;GO:0005576,extracellular region;GO:0005615,extracellular space;GO:0044421,extracellular region part;GO:0043226,organelle;GO:0070062,extracellular vesicular exosome;GO:0065010,extracellular membrane-bounded organelle;GO:0043230,extracellular organelle;GO:0031982,vesicle	GO:0005496,steroid binding;GO:0030234,enzyme regulator activity;GO:0004866,endopeptidase inhibitor activity;GO:0005488,binding;GO:0004857,enzyme inhibitor activity;GO:0008289,lipid binding;GO:0004867,serine-type endopeptidase inhibitor activity;GO:0030414,peptidase inhibitor activity	ko04610,Complement and coagulation cascades
227	sp|P01861|IGHG4_HUMAN	Immunoglobulin heavy constant gamma 4 OS=Homo sapiens OX=9606 GN=IGHG4 PE=1 SV=1	down	0.280223	0.00967051					B cell receptor signaling pathway;Hematopoietic cell lineage;Staphylococcus aureus infection;Phagosome;Calcium signaling pathway;Autoimmune thyroid disease;Systemic lupus erythematosus;Leishmaniasis;Natural killer cell mediated cytotoxicity;Primary immunodeficiency;Fc epsilon RI signaling pathway;Allograft rejection;Amoebiasis;Intestinal immune network for IgA production;Dilated cardiomyopathy;Vi…				ko05310,Asthma;ko05414,Dilated cardiomyopathy;ko04664,Fc epsilon RI signaling pathway;ko04145,Phagosome;ko05340,Primary immunodeficiency;ko04662,B cell receptor signaling pathway;ko05320,Autoimmune thyroid disease;ko05140,Leishmaniasis;ko05150,Staphylococcus aureus infection;ko04672,Intestinal immune network for IgA production;ko05322,Systemic lupus erythematosus;ko05330,Allograft rejection;ko040…
