# Supplementary material for: Exploration of Molecular Mechanism of Traditional Chinese Tuina Therapy for Insomnia by Proteomics Analysis
Source: Research Square preprint supplement (doi:10.21203/rs.3.rs-131184/v1), 2021-01-13
Supplement: Supplementary file 1 [file 7210c9f5f723e5b760e94899.docx]

**Exploration of molecular mechanism of Traditional Chinese Tuina therapy for insomnia by proteomics analysis**

Jing Zhou1,2,3, Biwei Cao2,3, Meng Wei2,3, Yuan Xiong2,3, Wan Liu2,3, Li Zhu2,3, and Yan Zhao2,3,*

**1**First Clinical Medical College, Hubei University of Chinese Medicine, Wuhan 430061, China

**2**Department of Tuina and Rehabilitation Medicine, Hubei Provincial Hospital of Traditional Chinese Medicine,Wuhan 430061, China

**3**Department of Tuina and Rehabilitation Medicine, Hubei Province Academy of Traditional Chinese Medicine, Wuhan 430074, China

*Correspondence should be addressed to Yan Zhao; [zhaoyan@hbhtcm.com](mailto:zhaoyan@hbhtcm.com)

**Supplementary information**

**Table S1.** Differentially expressed proteins of BTT *vs* HC , which were filtered by Fold Change > 1.2 for up regulated and Fold Change < 0.83 for down regulated, as well as with a statistical p-value ≤ 0.05.HC, the healthy control group; BTT, before Tuina treatment.

**Table S2.** Differentially expressed proteins of ATT *vs* HC , which were filtered by Fold Change > 1.2 for up regulated and Fold Change < 0.83 for down regulated, as well as with a statistical p-value ≤ 0.05. HC, the healthy control group; ATT, after Tuina treatment.

**Table S3.** Differentially expressed proteins of ATT *vs* BTT , which were filtered by Fold Change > 1.2 for up regulated and Fold Change < 0.83 for down regulated, as well as with a statistical p-value ≤ 0.05. BTT, before Tuina treatment; ATT, after Tuina treatment.

**Table S4.** Gene Ontology enrichment analysis results for differential expressed proteins between BTT and HC.HC, the healthy control; BTT, before Tuina treatment.

**Table S5.** Gene Ontology enrichment analysis results for differential expressed proteins between ATT and HC.HC, the healthy control; ATT, after Tuina treatment.

**Table S6.** Gene Ontology enrichment analysis results for differential expressed proteins between BTT and ATT.BTT, before Tuina treatment; ATT, after Tuina treatment.
